# Supplementary material for: Store-Operated Ca2+ Entry in Skeletal Muscle Contributes to the Increase in Body Temperature during Exertional Stress
Source: MDPI journal article supplement (doi:10.3390/ijms23073772), 2022-03-29
Supplement: s1 [file s1]

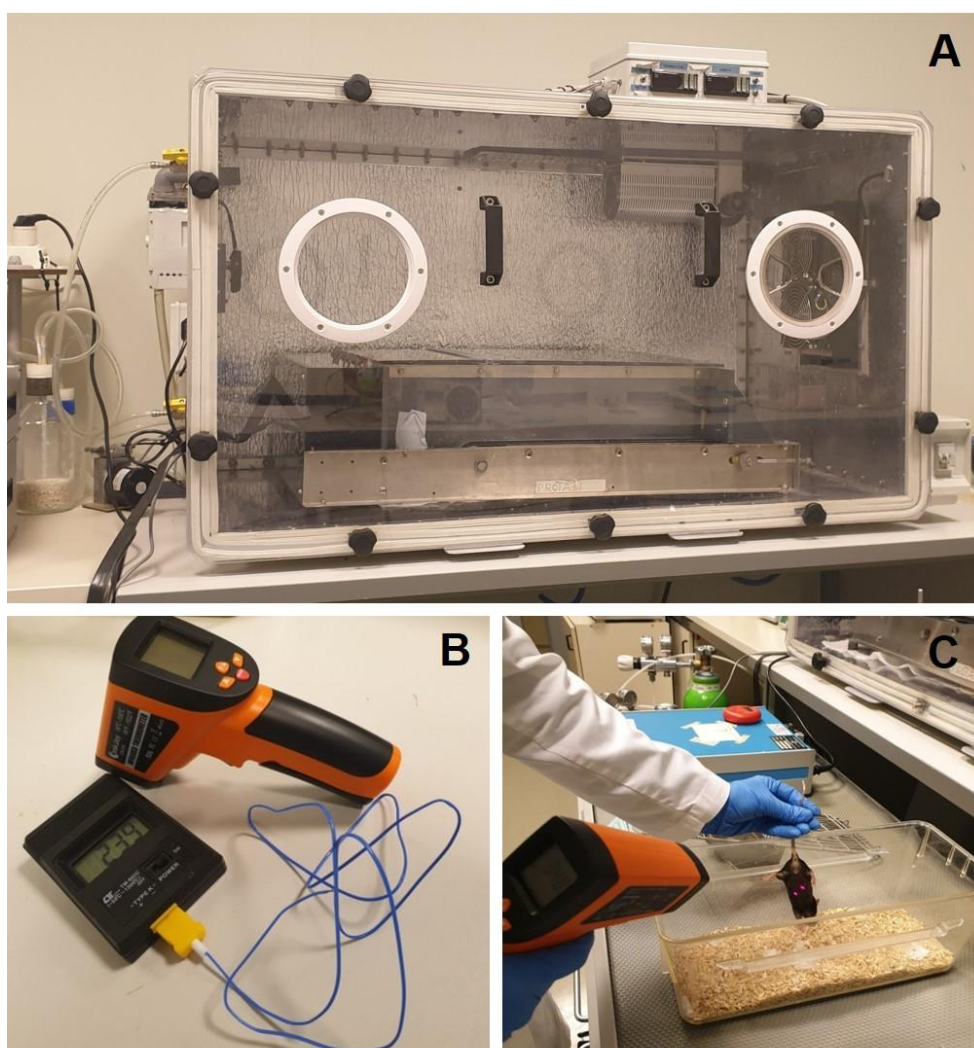

**Figure S1. Environmental chamber and infrared thermometer.** (A) The environmental chamber used during the ES protocol. B-C) Infrared thermometer (panel B) and its use during skin temperature measurement (panel C). See Suppl. Figure 2 for the outcome of these measurements.

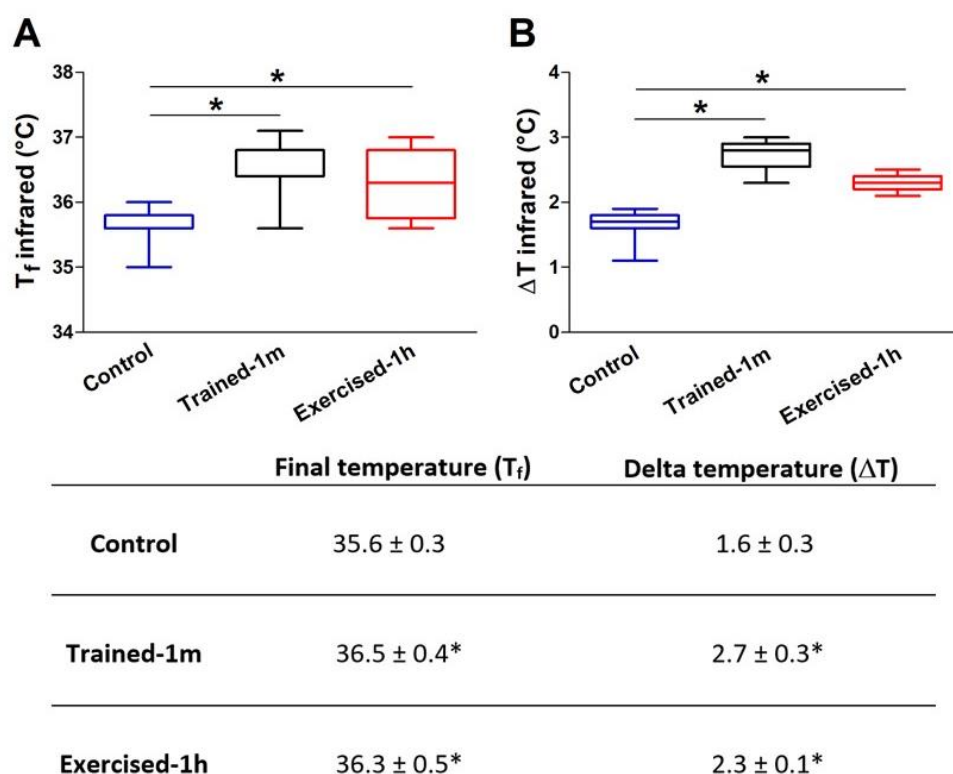

**Figure S2.** Average skin temperature of mice following the ES protocol recorded with the infrared thermometer (as shown in Suppl. Fig. 1 B and C). A) Average cutaneous temperature recorded at the end of the ES protocol ( $T_f$ ). B) Average changes in cutaneous temperature ( $\Delta T$ ) during ES protocol, i.e. the difference between temperatures measured at the beginning ( $T_0$ ) and at the end ( $T_f$ ) of the experiment. Data are shown as follow: i) the box extends from the 25<sup>th</sup> to 75<sup>th</sup> percentiles; the line in the middle of the box is plotted at the median and the whiskers go down to the smallest value and up to the largest (graphs in panels A and B); and ii) mean  $\pm$  SEM (\* $p < 0.05$ ), as evaluated by two-tailed unpaired Student's t-test (Table). Sample size (number of tested mice): control = 8; trained-1m = 8; exercised-1h = 9.

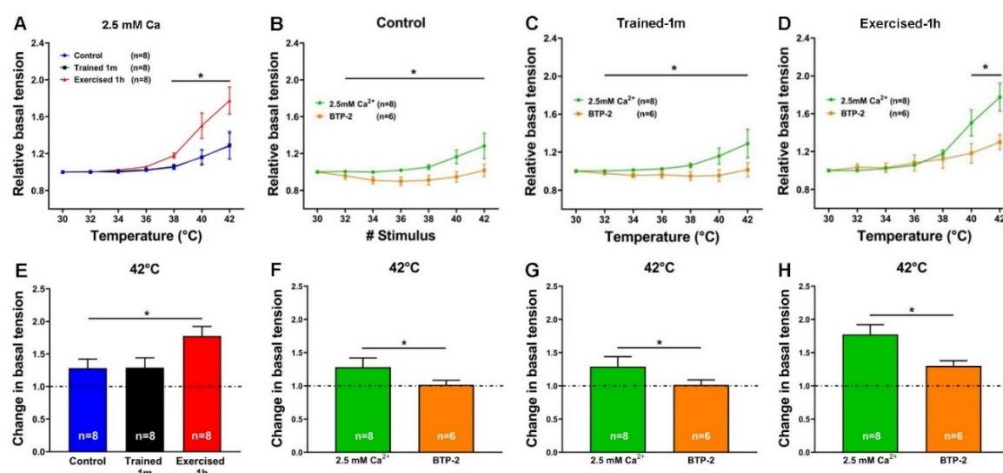

**Figure S3.** Relative and specific basal tension developed by isolated EDL muscles during an ex-vivo heat stress (HS) protocol. (A–D) Relative basal tension developed by EDL muscles during an ex-vivo HS protocol (i.e. 45-minute electrical stimulation with 60 single twitches, at 1 Hz, applied every 5 seconds). The chamber temperature was increased by 2°C (from 30°C to 42°C) every 5 minutes. Experiments were performed in presence of 2.5 mM of extracellular  $\text{Ca}^{2+}$  (panel A) or in a solution supplemented with 10  $\mu\text{M}$  BTP-2 (panels B–D). (E–H) Specific basal tension recorded at 42°C, either in presence of 2.5 mM of extracellular  $\text{Ca}^{2+}$  (panel E) or in a solution supplemented with 10  $\mu\text{M}$  BTP-2 (panels F–H). Data are shown as mean  $\pm$  SEM; in panels (A,E): \* $p < 0.05$  = \*indicate a difference between exercised-1h and both control and trained-

1m mice; in panels B-D and F-H: \* $p < 0.05$  = difference between 2.5mM  $\text{Ca}^{2+}$  and BTP-2; as evaluated by two-tailed unpaired Student's t-test). n = number of EDL muscles analysed.

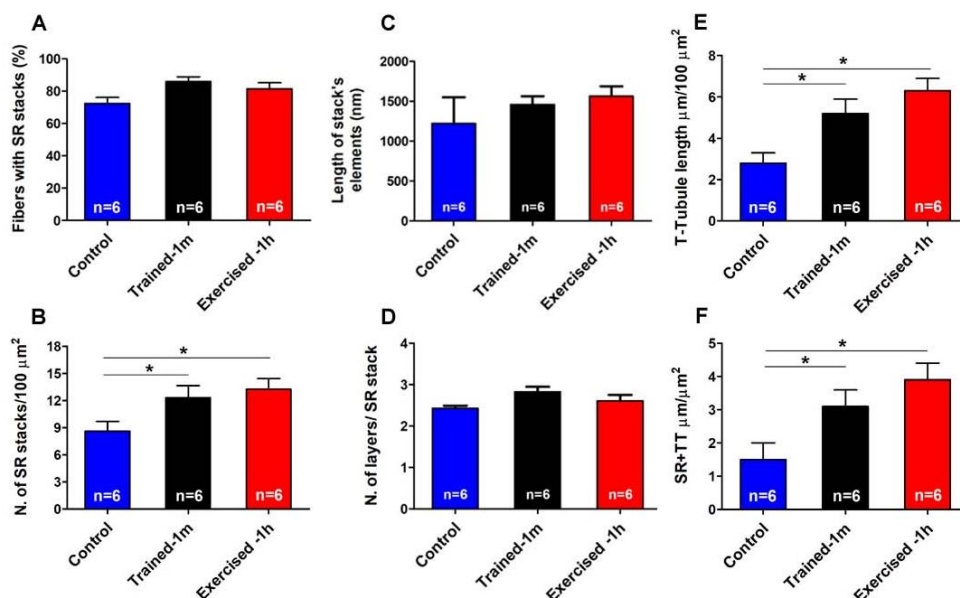

**Figure S4.** Quantitative EM analysis of SR-stacks and of T-tubule extension at the I band after the ES stress protocol. (A and B) Percentage of fibers containing SR-stacks and number of SR-stacks / 100  $\mu\text{m}^2$  of section. (C and D) Length of stack's elements (nm) and number of layers / SR-stack. (E and F) Extension of T-tubules at the I band in 100  $\mu\text{m}^2$  and extension of SR-TT contacts at the I band. Data are shown as mean  $\pm$  SEM (\* $p < 0.05$ ; the two ends of the line with asterisk indicate which two groups are being compared). n = number of EDL analysed.

**Table S1.** Average core temperature of mice following the ES protocol.

|              | Final temperature ( $T_f$ ) | Delta temperature ( $\Delta T$ ) |
|--------------|-----------------------------|----------------------------------|
| Control      | $37.9 \pm 0.2$              | $1.7 \pm 0.1$                    |
| Trained-1m   | $38.9 \pm 0.3^*$            | $2.7 \pm 0.2^*$                  |
| Exercised-1h | $38.8 \pm 0.5^*$            | $2.3 \pm 0.1^*$                  |

Sample size (number of tested mice): control, n = 8; trained-1m, n = 8; exercised-1h, n = 9. Data are shown as mean  $\pm$  SEM (\* $p < 0.05$ , as evaluated by two-tailed unpaired Student's t-test).

**Table S2.** Quantitative analysis of structural damage in longitudinal sections of EDL fibers in basal condition.

|              | % of fiber with no damage | % of altered fibers |
|--------------|---------------------------|---------------------|
| Control      | $98.6 \pm 1.4$            | $1.7 \pm 1.4$       |
| Trained-1m   | $98.2 \pm 1.8$            | $2.4 \pm 1.8$       |
| Exercised-1h | $98.5 \pm 1.5$            | $2.1 \pm 1.5$       |

Sample size (number of tested mice): n = 3 for each sample group. Data are shown as mean  $\pm$  SEM. Statistical significance was evaluated by two-tailed unpaired Student's t-test.

**Table S3.** Quantitative analysis of structural damage in longitudinal sections of EDL fibers, after the ES protocol.

|                     | % of fiber with<br>no damage | % of altered fibers |
|---------------------|------------------------------|---------------------|
| <b>Control</b>      | 94.0 ± 2.3                   | 6.5 ± 2.3           |
| <b>Trained-1m</b>   | 98.5 ± 0.9                   | 1.9 ± 0.9*          |
| <b>Exercised-1h</b> | 93.1 ± 2.6                   | 7.2 ± 2.6           |

Sample size (number of tested mice): n = 3 for each sample group. Data are shown as mean ± SEM (\*p < 0.05 vs. control and vs. exercised-1h, as evaluated by two-tailed unpaired Student's t-test.).

**Table S4.** Quantitative EM analysis of mitochondria n./area and relative volume.

|                     | No. of mitochondria<br>/100 $\mu\text{m}^2$ | Mitochondrial volume/total<br>volume (%) |
|---------------------|---------------------------------------------|------------------------------------------|
| <b>Control</b>      | 26.8 ± 0.8                                  | 3.8 ± 0.1                                |
| <b>Trained-1m</b>   | 41.1 ± 1.2*                                 | 7.1 ± 0.2*                               |
| <b>Exercised-1h</b> | 29.2 ± 0.9                                  | 4.0 ± 0.1                                |

Sample size (number of tested mice): control, n = 6; trained-1m, n = 4; exercised-1h, n = 6. Data are shown as mean ± SEM (\*p < 0.05 vs. control and vs. exercised-1h, as evaluated by two-tailed unpaired Student's t-test.).
